# Supplementary material
Source: PubMed Central journal article supplement (PMC7645130)
Supplement: Supplementary.pdf [file Supplementary.pdf]

| <b>1. Please mark your response to the following statements</b> |           |                  |              |               |
|-----------------------------------------------------------------|-----------|------------------|--------------|---------------|
| <b>1 = strongly disagree, 5 = strongly agree</b>                |           |                  |              |               |
|                                                                 | <b>n=</b> | <b>Overall %</b> | <b>MDI %</b> | <b>Pump %</b> |
| <b>a. I feel healthy</b>                                        |           |                  |              |               |
| 1                                                               | 28        | 1.8              | 1.8          | 1.8           |
| 2                                                               | 87        | 5.6              | 7.4          | 5             |
| 3                                                               | 287       | 18.6             | 19.5         | 18.3          |
| 4                                                               | 683       | 44.3             | 42.1         | 45.1          |
| 5                                                               | 455       | 29.5             | 29.2         | 29.6          |
| Decline to answer                                               | 2         | 0.1              | 0            | 0.2           |
| <b>b. I can do anything I set out to</b>                        |           |                  |              |               |
| 1                                                               | 28        | 1.8              | 1.5          | 1.9           |
| 2                                                               | 72        | 4.7              | 4.9          | 4.6           |
| 3                                                               | 233       | 15.1             | 14.9         | 15.2          |
| 4                                                               | 607       | 39.4             | 42.1         | 38.5          |
| 5                                                               | 598       | 38.8             | 36.7         | 39.5          |
| Decline to answer                                               | 4         | 0.3              | 0            | 0.3           |
| <b>c. Taking care of my diabetes is among my top priorities</b> |           |                  |              |               |
| 1                                                               | 21        | 1.4              | 1.5          | 1.3           |
| 2                                                               | 33        | 2.1              | 2.6          | 2             |
| 3                                                               | 105       | 6.8              | 7.9          | 6.4           |
| 4                                                               | 436       | 28.3             | 25.4         | 29.3          |
| 5                                                               | 931       | 60.4             | 61.3         | 60.1          |
| Decline to answer                                               | 16        | 1                | 1.3          | 1             |
| <b>d. I feel confident in managing my diabetes</b>              |           |                  |              |               |
| 1                                                               | 24        | 1.6              | 1.8          | 1.5           |
| 2                                                               | 64        | 4.2              | 5.4          | 3.7           |
| 3                                                               | 202       | 13.1             | 16.4         | 12            |
| 4                                                               | 654       | 42.4             | 41           | 42.9          |
| 5                                                               | 590       | 38.3             | 34.9         | 39.4          |
| Decline to answer                                               | 8         | 0.5              | 0.5          | 0.5           |
| <b>e. I have the tools to manage my diabetes</b>                |           |                  |              |               |
| 1                                                               | 32        | 2.1              | 2.8          | 1.8           |
| 2                                                               | 61        | 4                | 5.9          | 3.3           |
| 3                                                               | 211       | 13.7             | 15.6         | 13            |
| 4                                                               | 612       | 39.7             | 41           | 39.2          |
| 5                                                               | 618       | 40.1             | 34.1         | 42.1          |
| Decline to answer                                               | 8         | 0.5              | 0.5          | 0.5           |

| <b>2. On a scale from 1-5, how confident are you in:</b>                        |     |      |      |      |
|---------------------------------------------------------------------------------|-----|------|------|------|
| <b>1 = not confident, 5 = very confident</b>                                    |     |      |      |      |
| <b>a. Controlling your glucose</b>                                              |     |      |      |      |
| 1                                                                               | 21  | 1.4  | 2.1  | 1.1  |
| 2                                                                               | 88  | 5.7  | 6.2  | 5.6  |
| 3                                                                               | 398 | 25.8 | 27.9 | 25.1 |
| 4                                                                               | 767 | 49.7 | 46.4 | 50.9 |
| 5                                                                               | 267 | 17.3 | 17.4 | 17.3 |
| Decline to answer                                                               | 1   | 0.1  | 0    | 0.1  |
| <b>b. Calculating insulin doses</b>                                             |     |      |      |      |
| 1                                                                               | 9   | 0.6  | 0.5  | 0.6  |
| 2                                                                               | 51  | 3.3  | 5.1  | 2.7  |
| 3                                                                               | 231 | 15   | 16.7 | 14.4 |
| 4                                                                               | 677 | 43.9 | 45.9 | 43.2 |
| 5                                                                               | 571 | 37   | 31.3 | 39   |
| Decline to answer                                                               | 3   | 0.2  | 0.5  | 0.1  |
| <b>c. Counting carbs</b>                                                        |     |      |      |      |
| 1                                                                               | 26  | 1.7  | 2.1  | 1.6  |
| 2                                                                               | 94  | 6.1  | 8.5  | 5.3  |
| 3                                                                               | 309 | 20   | 22.8 | 19.1 |
| 4                                                                               | 641 | 41.6 | 37.7 | 42.9 |
| 5                                                                               | 463 | 30   | 28.5 | 30.6 |
| Decline to answer                                                               | 9   | 0.6  | 0.5  | 0.6  |
| <b>d. Avoiding hypoglycemia</b>                                                 |     |      |      |      |
| 1                                                                               | 25  | 1.6  | 1.5  | 1.6  |
| 2                                                                               | 139 | 9    | 8.5  | 9.2  |
| 3                                                                               | 497 | 32.2 | 32.1 | 32.3 |
| 4                                                                               | 669 | 43.4 | 43.3 | 43.4 |
| 5                                                                               | 212 | 13.7 | 14.6 | 13.5 |
| Decline to answer                                                               | 0   | -    | -    | -    |
| <b>e. Managing glucose during and after exercise</b>                            |     |      |      |      |
| 1                                                                               | 83  | 5.4  | 4.6  | 5.6  |
| 2                                                                               | 218 | 14.1 | 10.8 | 15.3 |
| 3                                                                               | 511 | 33.1 | 30.8 | 33.9 |
| 4                                                                               | 551 | 35.7 | 39.2 | 34.5 |
| 5                                                                               | 167 | 10.8 | 13.6 | 9.9  |
| Decline to answer                                                               | 12  | 0.8  | 1    | 0.7  |
| <b>3. Do you have regular access to smart phones, computers and/or tablets?</b> |     |      |      |      |
| <b>1 = no access, 5 = a lot of access</b>                                       |     |      |      |      |

|                                                                                                           |      |      |      |      |
|-----------------------------------------------------------------------------------------------------------|------|------|------|------|
| 1                                                                                                         | 10   | 0.6  | 0.5  | 0.7  |
| 2                                                                                                         | 3    | 0.2  | 0.3  | 0.2  |
| 3                                                                                                         | 7    | 0.5  | 1    | 0.3  |
| 4                                                                                                         | 72   | 4.7  | 5.4  | 4.4  |
| 5                                                                                                         | 1446 | 93.8 | 92.6 | 94.2 |
| Decline to answer                                                                                         | 4    | 0.3  | 0.3  | 0.3  |
| <b>4. Select all the phone technologies that you currently use</b>                                        |      |      |      |      |
| Landline                                                                                                  | 468  | 30.4 | 27.9 | 31.2 |
| Cellular phone/Flip phone (little to no internet capability)                                              | 87   | 5.6  | 6.4  | 5.4  |
| Smartphone + touch screen (internet connection)                                                           | 1496 | 97   | 94.9 | 97.7 |
| <b>5. How interested are you in using or acquiring a smartphone app to help you manage your diabetes?</b> |      |      |      |      |
| <b>1 = not interested, 5 = very interested</b>                                                            |      |      |      |      |
| 1                                                                                                         | 68   | 4.5  | 6.2  | 3.9  |
| 2                                                                                                         | 51   | 3.3  | 1.8  | 3.9  |
| 3                                                                                                         | 174  | 11.4 | 12.9 | 10.9 |
| 4                                                                                                         | 251  | 16.5 | 18.1 | 15.9 |
| 5                                                                                                         | 948  | 62.2 | 59.7 | 63   |
| Decline to answer                                                                                         | 33   | 2.2  | 1.3  | 2.5  |
| <b>6. How often do you have your phone with you?</b>                                                      |      |      |      |      |
| <b>0% = never 100% = all the time</b>                                                                     |      |      |      |      |
| 0%                                                                                                        | 5    | 0.3  | 0.8  | 0.2  |
| 1-25%                                                                                                     | 13   | 0.8  | 1.3  | 0.7  |
| 25-50%                                                                                                    | 27   | 1.8  | 2.1  | 1.6  |
| 50-75%                                                                                                    | 161  | 10.4 | 9.5  | 10.8 |
| 75-100%                                                                                                   | 1336 | 86.6 | 86.4 | 86.7 |
| Decline to answer                                                                                         | 0    | 0    | -    | -    |
| <b>7. How often do you wear a fitness monitor (i.e. Fitbit, Apple Watch, or Garmin)?</b>                  |      |      |      |      |
| <b>0% = never, 100% = all the time</b>                                                                    |      |      |      |      |
| 0%                                                                                                        | 802  | 52   | 61.5 | 48.8 |
| 1-25%                                                                                                     | 88   | 5.7  | 7.4  | 5.1  |
| 25-50%                                                                                                    | 57   | 3.7  | 3.1  | 3.9  |
| 50-75%                                                                                                    | 118  | 7.7  | 6.7  | 8    |
| 75-100%                                                                                                   | 474  | 30.7 | 21.3 | 33.9 |
| Decline to Answer                                                                                         | 3    | 0.2  | 0    | 0.3  |
| <b>8. On average, how often do/have you use(d) a phone application to manage your diabetes?</b>           |      |      |      |      |

|                                                                                                            |      |      |      |      |
|------------------------------------------------------------------------------------------------------------|------|------|------|------|
| Every couple of days or less                                                                               | 810  | 52.5 | 54.4 | 51.9 |
| 1-2x per day                                                                                               | 71   | 4.6  | 3.3  | 5    |
| 3-4x per day                                                                                               | 88   | 5.7  | 7.2  | 5.2  |
| 5-6x per day                                                                                               | 67   | 4.3  | 5.1  | 4.1  |
| >6x per day                                                                                                | 421  | 27.3 | 23.8 | 28.5 |
| Decline to Answer                                                                                          | 85   | 5.5  | 6.2  | 5.3  |
| <b>9. Have you ever used a phone application to calculate your insulin dose?</b>                           |      |      |      |      |
| Yes - I currently use a phone application to calculate my insulin dose                                     | 112  | 7.3  | 12.3 | 5.6  |
| Yes - I used a phone application in the past to calculate my insulin dose but stopped using it             | 132  | 8.6  | 7.7  | 8.9  |
| No - I have never used a phone application to calculate my insulin dose                                    | 1298 | 84.2 | 80   | 85.6 |
| <b>10. How often do you use a meter (such as Accu-check Expert Meter) to calculate your insulin doses?</b> |      |      |      |      |
| <b>0% = never, 75-100% = almost all the time</b>                                                           |      |      |      |      |
| 0%                                                                                                         | 682  | 44.2 | 44.1 | 44.3 |
| 1-25%                                                                                                      | 156  | 10.1 | 10   | 10.2 |
| 25-50%                                                                                                     | 92   | 6    | 6.4  | 5.8  |
| 50-75%                                                                                                     | 154  | 10   | 9.7  | 10.1 |
| 75-100%                                                                                                    | 446  | 28.9 | 29   | 28.9 |
| Decline to Answer                                                                                          | 12   | 0.8  | 0.8  | 0.8  |
| <b>11. On average, how often do you take a finger stick to test your glucose?</b>                          |      |      |      |      |
| Every couple of days or less                                                                               | 54   | 3.5  | 6.2  | 2.6  |
| 1-2x per day                                                                                               | 374  | 24.3 | 25.4 | 23.9 |
| 3-4x per day                                                                                               | 467  | 30.3 | 26.7 | 31.5 |
| 5-6x per day                                                                                               | 337  | 21.9 | 21   | 22.1 |
| 7-8x per day                                                                                               | 173  | 11.2 | 11   | 11.3 |
| 9-10x per day                                                                                              | 78   | 5.1  | 4.6  | 5.2  |
| >10x per day                                                                                               | 57   | 3.7  | 4.9  | 3.3  |
| Decline to Answer                                                                                          | 2    | 0.1  | 0.3  | 0.1  |
| <b>12. How often do you wear a CGM? (Section for CGM users only)</b>                                       |      |      |      |      |
| <b>0% = never, 100% = all the time</b>                                                                     |      |      |      |      |
| 0%                                                                                                         | 1    | 0.1  | 0.5  | 0    |
| 1-25%                                                                                                      | 12   | 1    | 0.5  | 1.1  |
| 25-50%                                                                                                     | 24   | 2.1  | 2.1  | 2.1  |
| 50-75%                                                                                                     | 79   | 6.8  | 7.3  | 6.7  |
| 75-100%                                                                                                    | 1047 | 90   | 89.5 | 90.1 |
| Decline to answer                                                                                          | 0    | -    | -    | -    |

| <b>13. How often do you look at your CGM throughout the day?</b>                                                                       |      |      |      |      |
|----------------------------------------------------------------------------------------------------------------------------------------|------|------|------|------|
| Rarely                                                                                                                                 | 4    | 0.3  | 0.5  | 0.3  |
| 1-3x per day                                                                                                                           | 20   | 1.7  | 1    | 1.9  |
| 4-6x per day                                                                                                                           | 96   | 8.3  | 7.3  | 8.4  |
| >6x per day                                                                                                                            | 1043 | 89.7 | 91.1 | 89.4 |
| Decline to Answer                                                                                                                      | 0    | -    | -    | -    |
| <b>14. On average, how often do you review your extended CGM glucose history on your phone or using a tool such as Dexcom Clarity?</b> |      |      |      |      |
| I am not aware of these tools                                                                                                          | 133  | 11.4 | 7.3  | 12.2 |
| I am aware of these tools but have never used them                                                                                     | 217  | 18.7 | 13.6 | 19.7 |
| 1 time per month                                                                                                                       | 325  | 27.9 | 28.8 | 27.8 |
| 1 time per week                                                                                                                        | 239  | 20.6 | 24.1 | 19.9 |
| Multiple times per week                                                                                                                | 136  | 11.7 | 12   | 11.6 |
| Daily                                                                                                                                  | 101  | 8.7  | 12.6 | 7.9  |
| Decline to answer                                                                                                                      | 12   | 1    | 1.6  | 0.9  |
| <b>15. How often do you use a CGM device used to perform the following actions?</b>                                                    |      |      |      |      |
| <b>1 = never, 5 = very often</b>                                                                                                       |      |      |      |      |
| <b>a. Check if you have high or low glucose</b>                                                                                        |      |      |      |      |
| Never, 1                                                                                                                               | 5    | 0.4  | 0.5  | 0.4  |
| 2                                                                                                                                      | 35   | 3    | 1.6  | 3.3  |
| 3                                                                                                                                      | 95   | 8.2  | 9.9  | 7.8  |
| 4                                                                                                                                      | 1028 | 88.4 | 88   | 88.5 |
| 5                                                                                                                                      | 0    | -    | -    | -    |
| Decline to answer                                                                                                                      | 0    | -    | -    | -    |
| <b>b. Check your glucose before eating</b>                                                                                             |      |      |      |      |
| Never, 1                                                                                                                               | 9    | 0.8  | 0    | 0.9  |
| 2                                                                                                                                      | 13   | 1.1  | 1    | 1.1  |
| 3                                                                                                                                      | 45   | 3.9  | 3.1  | 4    |
| 4                                                                                                                                      | 110  | 9.5  | 6.3  | 10.1 |
| 5                                                                                                                                      | 985  | 84.7 | 89.5 | 83.7 |
| Decline to answer                                                                                                                      | 1    | 0.1  | 0    | 0.1  |
| <b>c. Check your glucose before exercising</b>                                                                                         |      |      |      |      |
| Never, 1                                                                                                                               | 14   | 1.2  | 1    | 1.2  |
| 2                                                                                                                                      | 26   | 2.2  | 2.1  | 2.3  |
| 3                                                                                                                                      | 51   | 4.4  | 4.7  | 4.3  |
| 4                                                                                                                                      | 109  | 9.4  | 8.9  | 9.5  |
| 5                                                                                                                                      | 954  | 82   | 82.7 | 81.9 |

|                                                                                                                                              |     |      |      |      |
|----------------------------------------------------------------------------------------------------------------------------------------------|-----|------|------|------|
| Decline to answer                                                                                                                            | 9   | 0.8  | 0.5  | 0.8  |
| <b>d. Check your glucose before bedtime</b>                                                                                                  |     |      |      |      |
| Never, 1                                                                                                                                     | 9   | 0.8  | 0    | 0.9  |
| 2                                                                                                                                            | 14  | 1.2  | 0.5  | 1.3  |
| 3                                                                                                                                            | 48  | 4.1  | 3.1  | 4.3  |
| 4                                                                                                                                            | 96  | 8.3  | 8.4  | 8.2  |
| 5                                                                                                                                            | 996 | 85.6 | 88   | 85.2 |
| Decline to answer                                                                                                                            | 0   | -    | -    | -    |
| <b>e. Look at trend arrows</b>                                                                                                               |     |      |      |      |
| Never, 1                                                                                                                                     | 4   | 0.3  | 0.5  | 0.3  |
| 2                                                                                                                                            | 12  | 1    | 0    | 1.2  |
| 3                                                                                                                                            | 60  | 5.2  | 3.1  | 5.6  |
| 4                                                                                                                                            | 128 | 11   | 12.6 | 10.7 |
| 5                                                                                                                                            | 958 | 82.4 | 83.8 | 82.1 |
| Decline to answer                                                                                                                            | 1   | 0.1  | 0    | 0.1  |
| <b>f. Modify insulin dosing</b>                                                                                                              |     |      |      |      |
| Never, 1                                                                                                                                     | 20  | 1.7  | 1    | 1.9  |
| 2                                                                                                                                            | 32  | 2.8  | 1    | 3.1  |
| 3                                                                                                                                            | 99  | 8.5  | 6.3  | 9    |
| 4                                                                                                                                            | 193 | 16.6 | 18.3 | 16.3 |
| 5                                                                                                                                            | 818 | 70.3 | 73.3 | 69.8 |
| Decline to answer                                                                                                                            | 1   | 0.1  | 0    | 0.1  |
| <b>16. How often do you make changes to your long-acting insulin (i.e. Lantus)?</b>                                                          |     |      |      |      |
| Daily                                                                                                                                        | 51  | 3.3  | 8.5  | 1.6  |
| Weekly                                                                                                                                       | 79  | 5.1  | 9.7  | 3.6  |
| Monthly                                                                                                                                      | 135 | 8.8  | 16.2 | 6.2  |
| Every three months (i.e. after a doctor's visit/after my A1C)                                                                                | 449 | 29.1 | 58.5 | 19.2 |
| Decline to answer                                                                                                                            | 828 | 53.7 | 7.2  | 69.4 |
| <b>17. How often do you make changes to your short-acting (Novolog, Humalog, or Apidra) insulin ratios (such as carb ratios or factors)?</b> |     |      |      |      |
| I don't use ratios to calculate my insulin dose                                                                                              | 66  | 4.3  | 8.2  | 3    |
| Daily                                                                                                                                        | 361 | 23.4 | 44.9 | 16.1 |
| Weekly                                                                                                                                       | 117 | 7.6  | 5.1  | 8.4  |
| Monthly                                                                                                                                      | 263 | 17.1 | 8.7  | 19.9 |
| Every 3 months Every three months (i.e. after a doctor's visit/after my A1C)                                                                 | 680 | 44.1 | 29.5 | 49   |
| Decline to answer                                                                                                                            | 55  | 3.6  | 3.6  | 3.6  |
| <b>18. How soon would you want to know about a predicted hypoglycemic event?</b>                                                             |     |      |      |      |

|                                                                                                                                                                                                                   |      |      |      |      |
|-------------------------------------------------------------------------------------------------------------------------------------------------------------------------------------------------------------------|------|------|------|------|
| Never                                                                                                                                                                                                             | 3    | 0.2  | 0.3  | 0.2  |
| 5 mins prior                                                                                                                                                                                                      | 111  | 7.2  | 9    | 6.6  |
| 15 mins prior                                                                                                                                                                                                     | 543  | 35.2 | 37.7 | 34.4 |
| 30 mins prior                                                                                                                                                                                                     | 663  | 43   | 37.7 | 44.8 |
| >1 hour prior                                                                                                                                                                                                     | 219  | 14.2 | 15.1 | 13.9 |
| Decline to answer                                                                                                                                                                                                 | 3    | 0.2  | 0.3  | 0.2  |
| <b>19. How often do you want to review changes to insulin doses?</b>                                                                                                                                              |      |      |      |      |
| Never                                                                                                                                                                                                             | 34   | 2.2  | 4.9  | 1.3  |
| Daily                                                                                                                                                                                                             | 413  | 26.8 | 35.9 | 23.7 |
| Weekly                                                                                                                                                                                                            | 450  | 29.2 | 23.3 | 31.2 |
| Monthly                                                                                                                                                                                                           | 371  | 24.1 | 19.5 | 25.6 |
| Every few months                                                                                                                                                                                                  | 248  | 16.1 | 15.4 | 16.3 |
| Decline to answer                                                                                                                                                                                                 | 26   | 1.7  | 1    | 1.9  |
| <b>20. How interested would you be in a phone app with the following new features? Note this phone app would automatically receive your glucose level from a CGM and receive insulin doses from insulin pens.</b> |      |      |      |      |
| <b>1 = not interested, 2 = very interested</b>                                                                                                                                                                    |      |      |      |      |
| <b>a. Displays your predicted glucose trends over the next couple of hours</b>                                                                                                                                    |      |      |      |      |
| 1                                                                                                                                                                                                                 | 67   | 4.3  | 4.9  | 4.2  |
| 2                                                                                                                                                                                                                 | 46   | 3    | 4.1  | 2.6  |
| 3                                                                                                                                                                                                                 | 80   | 5.2  | 5.9  | 4.9  |
| 4                                                                                                                                                                                                                 | 232  | 15   | 16.4 | 14.6 |
| 5                                                                                                                                                                                                                 | 1111 | 72   | 68.7 | 73.2 |
| Decline to Answer                                                                                                                                                                                                 | 6    | 0.4  | 0    | 0.5  |
| <b>b. Assists you in avoiding hypoglycemia</b>                                                                                                                                                                    |      |      |      |      |
| 1                                                                                                                                                                                                                 | 49   | 3.2  | 2.8  | 3.3  |
| 2                                                                                                                                                                                                                 | 32   | 2.1  | 2.6  | 1.9  |
| 3                                                                                                                                                                                                                 | 60   | 3.9  | 4.9  | 3.6  |
| 4                                                                                                                                                                                                                 | 187  | 12.1 | 12.6 | 12   |
| 5                                                                                                                                                                                                                 | 1209 | 78.4 | 77.2 | 78.8 |
| Decline to Answer                                                                                                                                                                                                 | 5    | 0.3  | 0    | 0.4  |
| <b>c. Sets goals, such as a target average glucose</b>                                                                                                                                                            |      |      |      |      |
| 1                                                                                                                                                                                                                 | 107  | 6.9  | 6.7  | 7    |
| 2                                                                                                                                                                                                                 | 97   | 6.3  | 5.6  | 6.5  |
| 3                                                                                                                                                                                                                 | 184  | 11.9 | 14.6 | 11   |
| 4                                                                                                                                                                                                                 | 322  | 20.9 | 23.8 | 19.9 |
| 5                                                                                                                                                                                                                 | 827  | 53.6 | 49.2 | 55.1 |
| Decline to Answer                                                                                                                                                                                                 | 5    | 0.3  | 0    | 0.4  |

| <b>d. Suggests behavioral changes, such as sleep, exercise or nutrition based on past glucose control</b> |     |      |      |      |
|-----------------------------------------------------------------------------------------------------------|-----|------|------|------|
| 1                                                                                                         | 126 | 8.2  | 8.2  | 8.2  |
| 2                                                                                                         | 109 | 7.1  | 6.2  | 7.4  |
| 3                                                                                                         | 197 | 12.8 | 14.4 | 12.2 |
| 4                                                                                                         | 383 | 24.8 | 26.7 | 24.2 |
| 5                                                                                                         | 722 | 46.8 | 44.6 | 47.6 |
| Decline to answer                                                                                         | 5   | 0.3  | 0    | 0.4  |
| <b>e. Calculates insulin doses</b>                                                                        |     |      |      |      |
| 1                                                                                                         | 130 | 8.4  | 5.4  | 9.5  |
| 2                                                                                                         | 98  | 6.4  | 6.2  | 6.4  |
| 3                                                                                                         | 169 | 11   | 10.5 | 11.1 |
| 4                                                                                                         | 290 | 18.8 | 21.3 | 18   |
| 5                                                                                                         | 848 | 55   | 56.7 | 54.4 |
| Decline to answer                                                                                         | 7   | 0.5  | 0    | 0.6  |
| <b>f. Provides suggestions on how much short acting insulin to give for meal</b>                          |     |      |      |      |
| 1                                                                                                         | 108 | 7    | 4.6  | 7.8  |
| 2                                                                                                         | 75  | 4.9  | 4.4  | 5    |
| 3                                                                                                         | 144 | 9.3  | 10   | 9.1  |
| 4                                                                                                         | 309 | 20   | 21.8 | 19.4 |
| 5                                                                                                         | 900 | 58.4 | 59.2 | 58.1 |
| Decline to answer                                                                                         | 6   | 0.4  | 0    | 0.5  |
| <b>g. Provides insulin on board as a feature</b>                                                          |     |      |      |      |
| 1                                                                                                         | 100 | 6.5  | 6.4  | 6.5  |
| 2                                                                                                         | 68  | 4.4  | 5.4  | 4.1  |
| 3                                                                                                         | 134 | 8.7  | 10.8 | 8    |
| 4                                                                                                         | 230 | 14.9 | 18.7 | 13.6 |
| 5                                                                                                         | 989 | 64.1 | 56.9 | 66.6 |
| Decline to Answer                                                                                         | 21  | 1.4  | 1.8  | 1.2  |
| <b>h. Suggests changes to timing of insulin doses ratio</b>                                               |     |      |      |      |
| 1                                                                                                         | 69  | 4.5  | 2.8  | 5    |
| 2                                                                                                         | 53  | 3.4  | 4.4  | 3.1  |
| 3                                                                                                         | 122 | 7.9  | 12.1 | 6.5  |
| 4                                                                                                         | 334 | 21.7 | 22.6 | 21.4 |
| 5                                                                                                         | 956 | 62   | 57.7 | 63.5 |
| Decline to Answer                                                                                         | 8   | 0.5  | 0.5  | 0.5  |
| <b>i. Provides suggestions on how much long acting (basal) insulin to give</b>                            |     |      |      |      |
| 1                                                                                                         | 333 | 21.6 | 5.1  | 27.2 |
| 2                                                                                                         | 81  | 5.3  | 7.7  | 4.4  |



|                                                                                                                                                                             |      |      |      |      |
|-----------------------------------------------------------------------------------------------------------------------------------------------------------------------------|------|------|------|------|
| 3                                                                                                                                                                           | 145  | 9.4  | 10.3 | 9.1  |
| 4                                                                                                                                                                           | 214  | 13.9 | 21.5 | 11.3 |
| 5                                                                                                                                                                           | 680  | 44.1 | 55.4 | 40.3 |
| Decline to Answer                                                                                                                                                           | 89   | 5.8  | 0    | 7.7  |
| <b>j. Is able to look at past meal glucose and suggest insulin to carb ratio</b>                                                                                            |      |      |      |      |
| 1                                                                                                                                                                           | 71   | 4.6  | 4.4  | 4.7  |
| 2                                                                                                                                                                           | 39   | 2.5  | 4.1  | 2    |
| 3                                                                                                                                                                           | 112  | 7.3  | 8.2  | 6.9  |
| 4                                                                                                                                                                           | 310  | 20.1 | 20.3 | 20.1 |
| 5                                                                                                                                                                           | 1005 | 65.2 | 62.8 | 66   |
| Decline to Answer                                                                                                                                                           | 5    | 0.3  | 0.3  | 0.3  |
| <b>k. Is able to count carbs</b>                                                                                                                                            |      |      |      |      |
| 1                                                                                                                                                                           | 76   | 4.9  | 6.4  | 4.4  |
| 2                                                                                                                                                                           | 49   | 3.2  | 4.9  | 2.6  |
| 3                                                                                                                                                                           | 115  | 7.5  | 10   | 6.6  |
| 4                                                                                                                                                                           | 241  | 15.6 | 15.9 | 15.5 |
| 5                                                                                                                                                                           | 1054 | 68.4 | 62.1 | 70.5 |
| Decline to answer                                                                                                                                                           | 7    | 0.5  | 0.8  | 0.3  |
| <b>l. Enables you to enter meal characteristics (carbohydrate, protein, fat content) to help manage glucose</b>                                                             |      |      |      |      |
| 1                                                                                                                                                                           | 93   | 6    | 6.9  | 5.7  |
| 2                                                                                                                                                                           | 83   | 5.4  | 7.4  | 4.7  |
| 3                                                                                                                                                                           | 155  | 10.1 | 11   | 9.7  |
| 4                                                                                                                                                                           | 322  | 20.9 | 24.1 | 19.8 |
| 5                                                                                                                                                                           | 882  | 57.2 | 50.3 | 59.5 |
| Decline to answer                                                                                                                                                           | 7    | 0.5  | 0.3  | 0.5  |
| <b>m. Enables you to capture photos of your meals and relate this to your glucose management (e.g. a certain meal resulted in higher glucose, or required more insulin)</b> |      |      |      |      |
| 1                                                                                                                                                                           | 174  | 11.3 | 12.1 | 11   |
| 2                                                                                                                                                                           | 122  | 7.9  | 7.9  | 7.9  |
| 3                                                                                                                                                                           | 216  | 14   | 17.9 | 12.7 |
| 4                                                                                                                                                                           | 273  | 17.7 | 18.7 | 17.4 |
| 5                                                                                                                                                                           | 751  | 48.7 | 43.1 | 50.6 |
| Decline to answer                                                                                                                                                           | 6    | 0.4  | 0.3  | 0.4  |
| <b>n. Assists you in monitoring glucose during and after exercise</b>                                                                                                       |      |      |      |      |
| 1                                                                                                                                                                           | 59   | 3.8  | 3.1  | 4.1  |
| 2                                                                                                                                                                           | 52   | 3.4  | 4.1  | 3.1  |
| 3                                                                                                                                                                           | 117  | 7.6  | 8.7  | 7.2  |

|                                                                                                                                           |      |      |      |      |
|-------------------------------------------------------------------------------------------------------------------------------------------|------|------|------|------|
| 4                                                                                                                                         | 290  | 18.8 | 23.3 | 17.3 |
| 5                                                                                                                                         | 1019 | 66.1 | 60.8 | 67.9 |
| Decline to Answer                                                                                                                         | 5    | 0.3  | 0    | 0.4  |
| <b>o. Displays predicted glucose trends taking exercise into consideration (i.e. if you are about to exercise or have just exercised)</b> |      |      |      |      |
| 1                                                                                                                                         | 58   | 3.8  | 3.1  | 4    |
| 2                                                                                                                                         | 45   | 2.9  | 3.6  | 2.7  |
| 3                                                                                                                                         | 95   | 6.2  | 9    | 5.2  |
| 4                                                                                                                                         | 273  | 17.7 | 18.7 | 17.4 |
| 5                                                                                                                                         | 1066 | 69.1 | 65.6 | 70.3 |
| Decline to Answer                                                                                                                         | 5    | 0.3  | 0    | 0.4  |
| <b>p. Uses an activity tracker to monitor exercise and improve glucose trends over the next couple of hours</b>                           |      |      |      |      |
| 1                                                                                                                                         | 64   | 4.2  | 3.1  | 4.5  |
| 2                                                                                                                                         | 58   | 3.8  | 4.6  | 3.5  |
| 3                                                                                                                                         | 133  | 8.6  | 12.6 | 7.3  |
| 4                                                                                                                                         | 302  | 19.6 | 23.6 | 18.2 |
| 5                                                                                                                                         | 977  | 63.4 | 55.4 | 66.1 |
| Decline to Answer                                                                                                                         | 8    | 0.5  | 0.8  | 0.4  |
| <b>21. How interested are you in a phone app that sends the following alerts?</b>                                                         |      |      |      |      |
| <b>1 = not interested, 5 = very interested</b>                                                                                            |      |      |      |      |
| <b>a. Hypoglycemic events</b>                                                                                                             |      |      |      |      |
| 1                                                                                                                                         | 73   | 4.7  | 4.6  | 4.8  |
| 2                                                                                                                                         | 44   | 2.9  | 2.6  | 3    |
| 3                                                                                                                                         | 108  | 7    | 10   | 6    |
| 4                                                                                                                                         | 220  | 14.3 | 16.2 | 13.6 |
| 5                                                                                                                                         | 1094 | 70.9 | 66.7 | 72.4 |
| Decline to answer                                                                                                                         | 3    | 0.2  | 0    | 0.3  |
| <b>b. Predicted hypoglycemic event</b>                                                                                                    |      |      |      |      |
| 1                                                                                                                                         | 52   | 3.4  | 2.6  | 3.6  |
| 2                                                                                                                                         | 40   | 2.6  | 2.6  | 2.6  |
| 3                                                                                                                                         | 96   | 6.2  | 7.9  | 5.6  |
| 4                                                                                                                                         | 300  | 19.5 | 22.3 | 18.5 |
| 5                                                                                                                                         | 1051 | 68.2 | 64.6 | 69.4 |
| Decline to answer                                                                                                                         | 3    | 0.2  | 0    | 0.3  |
| <b>c. Predicted nighttime hypoglycemic events</b>                                                                                         |      |      |      |      |
| 1                                                                                                                                         | 54   | 3.5  | 2.6  | 3.8  |
| 2                                                                                                                                         | 44   | 2.9  | 3.1  | 2.8  |
| 3                                                                                                                                         | 70   | 4.5  | 7.9  | 3.4  |

|                                                                                        |      |      |      |      |
|----------------------------------------------------------------------------------------|------|------|------|------|
| 4                                                                                      | 237  | 15.4 | 16.2 | 15.1 |
| 5                                                                                      | 1133 | 73.5 | 70.3 | 74.6 |
| Decline to answer                                                                      | 4    | 0.3  | 0    | 0.3  |
| <b>d. Hyperglycemic events</b>                                                         |      |      |      |      |
| 1                                                                                      | 78   | 5.1  | 4.4  | 5.3  |
| 2                                                                                      | 68   | 4.4  | 4.1  | 4.5  |
| 3                                                                                      | 168  | 10.9 | 13.6 | 10   |
| 4                                                                                      | 330  | 21.4 | 24.4 | 20.4 |
| 5                                                                                      | 895  | 58   | 53.6 | 59.5 |
| Decline to answer                                                                      | 3    | 0.2  | 0    | 0.3  |
| <b>e. Predicted hyperglycemic events</b>                                               |      |      |      |      |
| 1                                                                                      | 64   | 4.2  | 3.3  | 4.4  |
| 2                                                                                      | 65   | 4.2  | 4.4  | 4.2  |
| 3                                                                                      | 152  | 9.9  | 11.8 | 9.2  |
| 4                                                                                      | 352  | 22.8 | 26.7 | 21.5 |
| 5                                                                                      | 905  | 58.7 | 53.8 | 60.3 |
| Decline to answer                                                                      | 4    | 0.3  | 0    | 0.3  |
| <b>f. Missed insulin doses</b>                                                         |      |      |      |      |
| 1                                                                                      | 195  | 12.6 | 9.7  | 13.6 |
| 2                                                                                      | 96   | 6.2  | 4.9  | 6.7  |
| 3                                                                                      | 200  | 13   | 10.3 | 13.9 |
| 4                                                                                      | 250  | 16.2 | 18.5 | 15.5 |
| 5                                                                                      | 790  | 51.2 | 56.4 | 49.5 |
| 6                                                                                      | 11   | 0.7  | 0.3  | 0.9  |
| Decline to answer                                                                      | 0    | -    |      |      |
| <b>g. Suggested changes to insulin dosing or carbohydrate intake based on exercise</b> |      |      |      |      |
| 1                                                                                      | 72   | 4.7  | 4.9  | 4.6  |
| 2                                                                                      | 53   | 3.4  | 3.3  | 3.5  |
| 3                                                                                      | 147  | 9.5  | 12.1 | 8.7  |
| 4                                                                                      | 350  | 22.7 | 26.2 | 21.5 |
| 5                                                                                      | 916  | 59.4 | 53.6 | 61.4 |
| Decline to answer                                                                      | 4    | 0.3  | 0    | 0.3  |
| <b>h. Reminders to check your blood glucose</b>                                        |      |      |      |      |
| 1                                                                                      | 382  | 24.8 | 22.3 | 25.6 |
| 2                                                                                      | 201  | 13   | 11   | 13.7 |
| 3                                                                                      | 329  | 21.3 | 22.6 | 20.9 |
| 4                                                                                      | 217  | 14.1 | 13.6 | 14.2 |
| 5                                                                                      | 409  | 26.5 | 30.5 | 25.2 |

|                                                                                                                                                             |     |      |      |      |     |
|-------------------------------------------------------------------------------------------------------------------------------------------------------------|-----|------|------|------|-----|
|                                                                                                                                                             | 6   | 4    | 0.3  | 0    | 0.3 |
| Decline to answer                                                                                                                                           | 0   | -    | -    | -    | -   |
| <b>22. How soon would you want to know about a low blood sugar that will likely occur in the future?</b>                                                    |     |      |      |      |     |
| Never                                                                                                                                                       | 5   | 0.3  | 0.5  | 0.3  |     |
| 5 mins prior                                                                                                                                                | 92  | 6    | 6.7  | 5.7  |     |
| 15 mins prior                                                                                                                                               | 490 | 31.8 | 36.2 | 30.3 |     |
| 30 mins prior                                                                                                                                               | 742 | 48.1 | 43.3 | 49.7 |     |
| >1 hour prior                                                                                                                                               | 212 | 13.7 | 13.3 | 13.9 |     |
| Decline to answer                                                                                                                                           | 1   | 0.1  | 0    | 0.1  |     |
| <b>23. How often would you want to be alerted to improve your glucose control (to avoid lows and highs)?</b>                                                |     |      |      |      |     |
| I would not want to be alerted by a phone app to help control my diabetes                                                                                   | 175 | 11.3 | 13.1 | 10.8 |     |
| Up to 1-3 times per day                                                                                                                                     | 749 | 48.6 | 50.3 | 48   |     |
| Up to 4-6 times per day                                                                                                                                     | 270 | 17.5 | 17.9 | 17.4 |     |
| More than 6 times per day if needed                                                                                                                         | 320 | 20.8 | 16.9 | 22   |     |
| Decline to answer                                                                                                                                           | 28  | 1.8  | 1.8  | 1.8  |     |
| <b>24. How often do you want to review changes to insulin doses, for the purpose of adjusting basal doses, correction doses, and insulin to carb ratio?</b> |     |      |      |      |     |
| Never                                                                                                                                                       | 40  | 2.6  | 3.8  | 2.2  |     |
| Daily                                                                                                                                                       | 363 | 23.5 | 34.4 | 19.9 |     |
| Weekly                                                                                                                                                      | 627 | 40.7 | 32.3 | 43.5 |     |
| Monthly                                                                                                                                                     | 350 | 22.7 | 19.2 | 23.9 |     |
| Every few months                                                                                                                                            | 146 | 9.5  | 9    | 9.6  |     |
| Decline to answer                                                                                                                                           | 16  | 1    | 1.3  | 1    |     |

**Supplementary Table 1: Survey Questions and Responses.** Complete text of the survey questions with the total number of responses, percentage for all respondents, respondent using MDI and respondents using pumps for each answer option for each question.

**Please mark your response to the following statements**

1 = Strongly disagree, 5 = Strongly agree

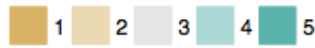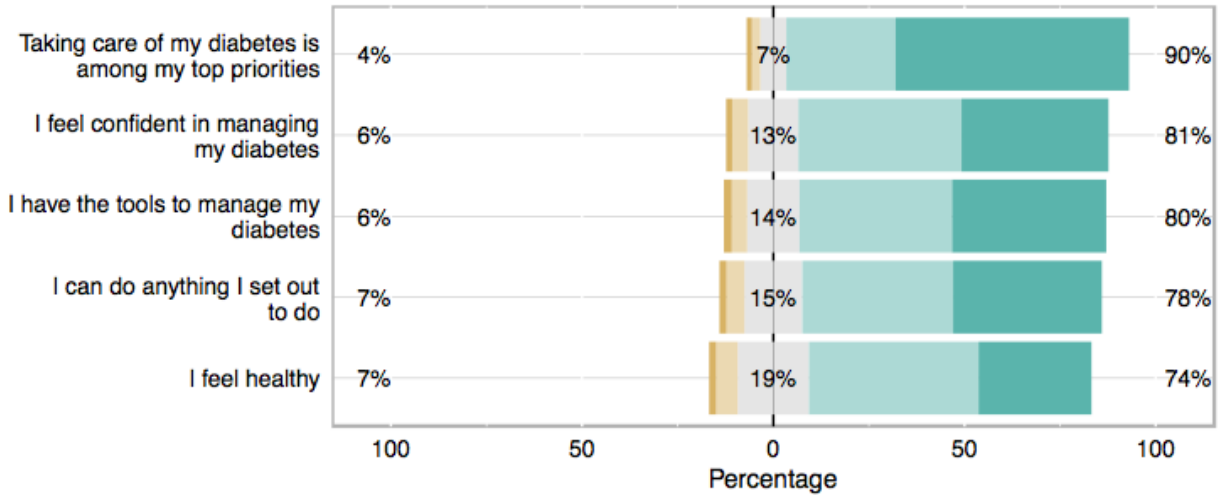

**On a scale from 1–5, how confident are you in:**

1 = Not confident, 5 = Very confident

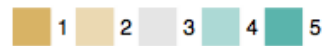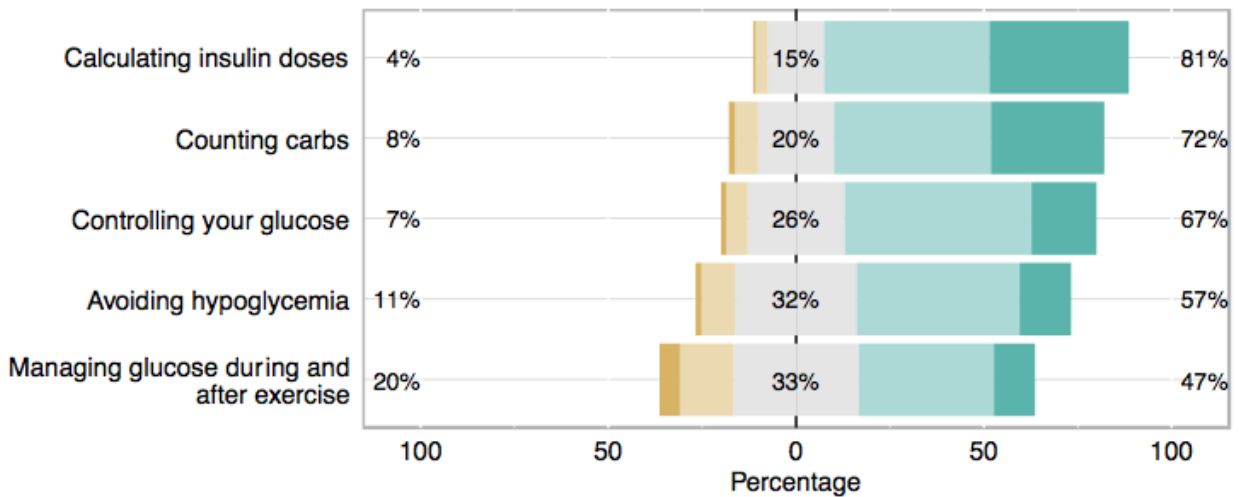

**Supplementary Figure 1: Likert responses for question motivation and confidence questions.** Responses related to the survey respondents' (a) motivation and (b) personal confidence in diabetes management. The percentages listed are for scores of 1, 3, and 5 from left to right. (1=Not interested, 3=Neutral, 5=Very interested)
